# Supplementary material
Source: HighWire-hosted journal article supplement (https://www.cmajopen.ca/highwire/filestream/87502/field_highwire_adjunct_files/0/open-2021-0036-1-at.pdf)
Supplement: open-2021-0036-1-at.pdf [file open-2021-0036-1-at.pdf]

# Supplementary Material to

## COVID-19 Risk Stratification: a Multivariable Model Based on Gradient Boosting Decision Trees

### Contents

- **Supplementary Figures**
  - Supplementary Figure 1 - SHAP value summary plot
  - Supplementary Figure 2 - Partial dependence plots
- **Supplementary Tables**
  - Supplementary Table 1 - Predictor variables considered for building XGBoost model
  - Supplementary Table 2 - Calibration curve raw data

Appendix 1, as supplied by the authors. Appendix to: Gutierrez JM, Volkovs M, Poutanen T, et al. Risk stratification for COVID-19 hospitalization: a multivariable model based on gradient-boosting decision trees. *CMAJ Open* 2021. doi: 10.9778/cmajo.20210036. Copyright © 2021 The Author(s) or their employer(s). To receive this resource in an accessible format, please contact us at [cmajgroup@cmaj.ca](mailto:cmajgroup@cmaj.ca).

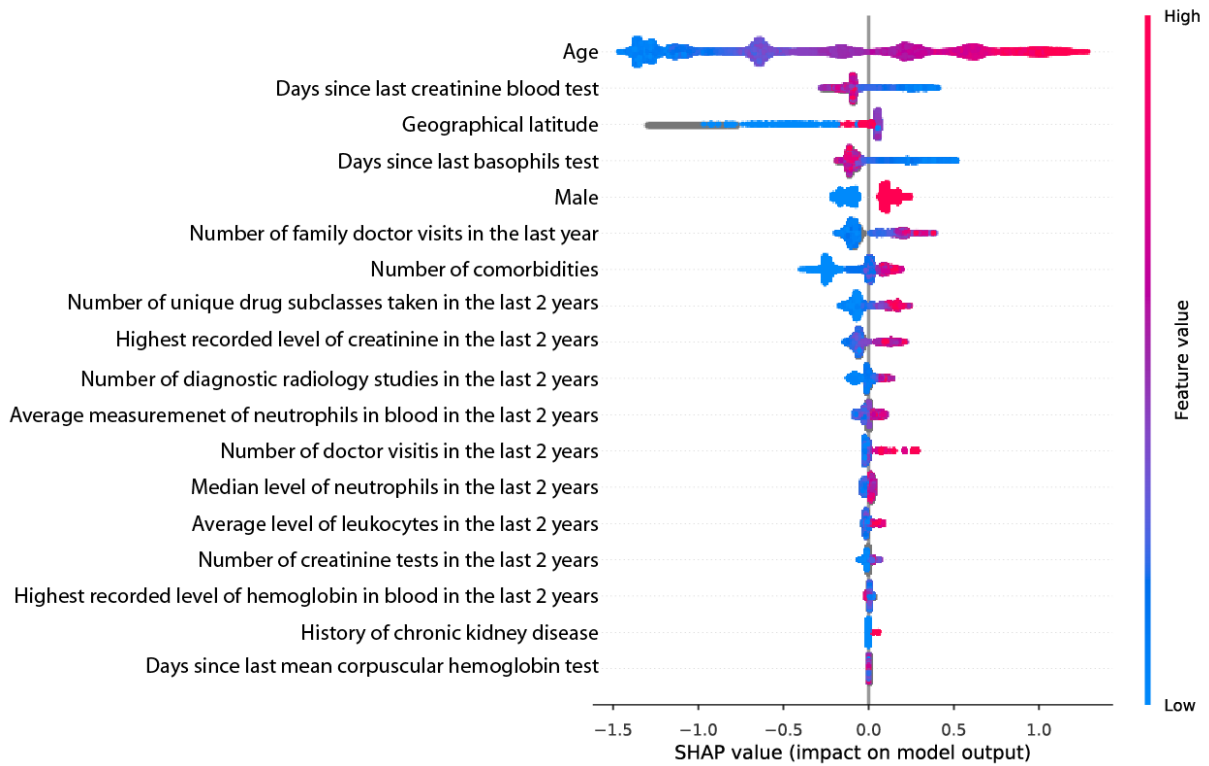

**Supplementary Figure 1 - Summary of SHAP values across predictor variables included in XGBoost model.** Each dot represents a data point (patient) and the color indicates magnitude of feature value (red is high, blue is low)

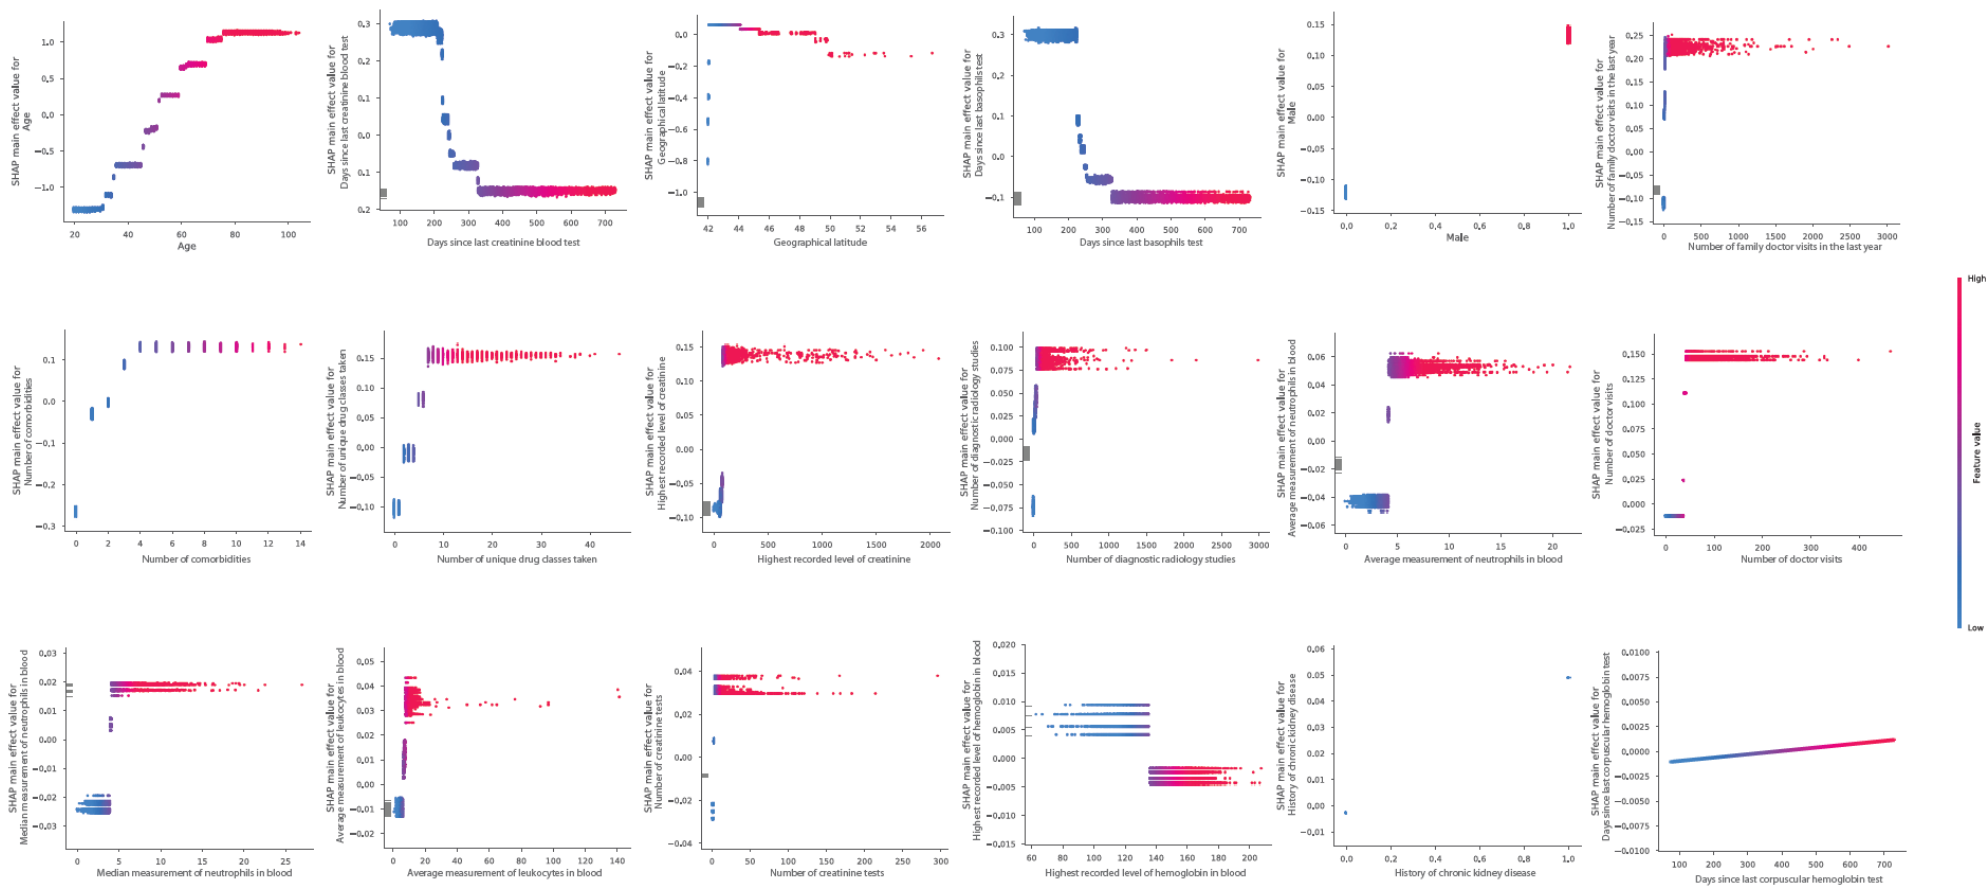

**Supplementary Figure 2 - Partial dependence plots for predictor variables included in XGBoost model.** In each plot, the horizontal axis is the value of the independent variable and the vertical axis represents the change in marginal SHAP value change while fixing all other variables. The color of each dot indicates the magnitude of feature value (red is high, blue is low). Variables are sorted in descending order by overall contribution (from left to right and top to bottom) in the same order as in Supplementary Figure 1.

**Supplementary Table 1** - Predictor variables considered for building XGBoost model

*Note: only variables included for model development and variables selection (N=133) are listed here.*

| <b>Predictor variable</b>                                         | <b>Fraction of patients without observations for variable</b> | <b>Decision (discard missing if fraction &gt; 0.5)</b> |
|-------------------------------------------------------------------|---------------------------------------------------------------|--------------------------------------------------------|
| 1-year summary (Drug prescriptions) - unique drug subclasses      | 0.000000                                                      | INCLUDE                                                |
| 1-year summary (Doctor visits) - COUNTS                           | 0.000000                                                      | INCLUDE                                                |
| 2-year summary (Drug prescriptions) - unique drug subclasses      | 0.000000                                                      | INCLUDE                                                |
| 2-year summary (Doctor visits) - COUNTS                           | 0.000000                                                      | INCLUDE                                                |
| (Demographics) - Age                                              | 0.000000                                                      | INCLUDE                                                |
| (Demographics) - History of acute myocardial infarction           | 0.000000                                                      | INCLUDE                                                |
| (Demographics) - History of arrhythmia                            | 0.000000                                                      | INCLUDE                                                |
| (Demographics) - History of arthritis                             | 0.000000                                                      | INCLUDE                                                |
| (Demographics) - History of asthma                                | 0.000000                                                      | INCLUDE                                                |
| (Demographics) - History of cancer                                | 0.000000                                                      | INCLUDE                                                |
| (Demographics) - History of chronic heart failure                 | 0.000000                                                      | INCLUDE                                                |
| (Demographics) - History of colitis                               | 0.000000                                                      | INCLUDE                                                |
| (Demographics) - History of chronic obstructive pulmonary disease | 0.000000                                                      | INCLUDE                                                |
| (Demographics) - History of coronary disease                      | 0.000000                                                      | INCLUDE                                                |
| (Demographics) - History of dementia                              | 0.000000                                                      | INCLUDE                                                |
| (Demographics) - History of diabetes                              | 0.000000                                                      | INCLUDE                                                |
| (Demographics) - History of hypertension                          | 0.000000                                                      | INCLUDE                                                |
| (Demographics) - Sex                                              | 0.000000                                                      | INCLUDE                                                |
| (Demographics) - History of mental illness                        | 0.000000                                                      | INCLUDE                                                |
| (Demographics) - History of mood disorder                         | 0.000000                                                      | INCLUDE                                                |
| (Demographics) - Number comorbidities                             | 0.000000                                                      | INCLUDE                                                |
| (Demographics) - History of ostarthritis                          | 0.000000                                                      | INCLUDE                                                |
| (Demographics) - History of osteoporosis                          | 0.000000                                                      | INCLUDE                                                |
| (Demographics) - History of kidney disease                        | 0.000000                                                      | INCLUDE                                                |

|                                                                              |          |         |
|------------------------------------------------------------------------------|----------|---------|
| (Demographics) - History of stroke                                           | 0.000000 | INCLUDE |
| (Geographical) - Education quantile                                          | 0.075655 | INCLUDE |
| (Geographical) - Lives in Ontario eastern region                             | 0.075655 | INCLUDE |
| (Geographical) - Lives in Ontario GTHA region                                | 0.075655 | INCLUDE |
| (Geographical) - Lives in Toronto                                            | 0.075655 | INCLUDE |
| (Demographics) - Marginalized dependencies indicator                         | 0.075655 | INCLUDE |
| (Demographics) - Marginalized deprivation indicator                          | 0.075655 | INCLUDE |
| (Demographics) - Marginalized ethnicity indicator                            | 0.075655 | INCLUDE |
| (Demographics) - Marginalized instability quintile                           | 0.075655 | INCLUDE |
| (Geographical) - Lives in Ontario western region                             | 0.075655 | INCLUDE |
| (Geographical) - Lives in Ontario northern region                            | 0.075655 | INCLUDE |
| (Geographical) - LHIN number                                                 | 0.075957 | INCLUDE |
| (Geographical) - Latitude                                                    | 0.077829 | INCLUDE |
| (Geographical) - Longitude                                                   | 0.077829 | INCLUDE |
| (Demographics) - Income quantile                                             | 0.078408 | INCLUDE |
| (Geographical) - Lives in rural community                                    | 0.078408 | INCLUDE |
| 2-year summary (Doctor visits) - FAMILY PRACTICE AND GENERAL PRACTICE        | 0.079812 | INCLUDE |
| 1-year summary (Doctor visits) - FAMILY PRACTICE AND GENERAL PRACTICE        | 0.168103 | INCLUDE |
| 2-year summary (Laboratory tests) - number of tests for Neutrophils          | 0.354541 | INCLUDE |
| 2-year summary (Laboratory tests) - days since earliest test for Neutrophils | 0.354541 | INCLUDE |
| 2-year summary (Laboratory tests) - days since latest test for Neutrophils   | 0.354541 | INCLUDE |
| 2-year summary (Laboratory tests) - number of high values of Neutrophils     | 0.354541 | INCLUDE |
| 2-year summary (Laboratory tests) - highest value of Neutrophils             | 0.354541 | INCLUDE |
| 2-year summary (Laboratory tests) - number of low values of Neutrophils      | 0.354541 | INCLUDE |
| 2-year summary (Laboratory tests) - lowest value of Neutrophils              | 0.354541 | INCLUDE |
| 2-year summary (Laboratory tests) - average value of Neutrophils             | 0.354541 | INCLUDE |
| 2-year summary (Laboratory tests) - median value of Neutrophils              | 0.354541 | INCLUDE |
| 2-year summary (Laboratory tests) - count of normal tests for Neutrophils    | 0.354541 | INCLUDE |
| 2-year summary (Laboratory tests) - number of tests for Eosinophils          | 0.354872 | INCLUDE |
| 2-year summary (Laboratory tests) - days since earliest test for Eosinophils | 0.354872 | INCLUDE |

|                                                                             |          |         |
|-----------------------------------------------------------------------------|----------|---------|
| 2-year summary (Laboratory tests) - days since latest test for Eosinophils  | 0.354872 | INCLUDE |
| 2-year summary (Laboratory tests) - number of high values of Eosinophils    | 0.354872 | INCLUDE |
| 2-year summary (Laboratory tests) - highest value of Eosinophils            | 0.354872 | INCLUDE |
| 2-year summary (Laboratory tests) - number of low values of Eosinophils     | 0.354872 | INCLUDE |
| 2-year summary (Laboratory tests) - lowest value of Eosinophils             | 0.354872 | INCLUDE |
| 2-year summary (Laboratory tests) - average value of Eosinophils            | 0.354872 | INCLUDE |
| 2-year summary (Laboratory tests) - median value of Eosinophils             | 0.354872 | INCLUDE |
| 2-year summary (Laboratory tests) - count of normal tests for Eosinophils   | 0.354872 | INCLUDE |
| 2-year summary (Laboratory tests) - number of tests for Leukocytes          | 0.354899 | INCLUDE |
| 2-year summary (Laboratory tests) - days since earliest test for Leukocytes | 0.354899 | INCLUDE |
| 2-year summary (Laboratory tests) - days since latest test for Leukocytes   | 0.354899 | INCLUDE |
| 2-year summary (Laboratory tests) - number of high values of Leukocytes     | 0.354899 | INCLUDE |
| 2-year summary (Laboratory tests) - highest value of Leukocytes             | 0.354899 | INCLUDE |
| 2-year summary (Laboratory tests) - number of low values of Leukocytes      | 0.354899 | INCLUDE |
| 2-year summary (Laboratory tests) - lowest value of Leukocytes              | 0.354899 | INCLUDE |
| 2-year summary (Laboratory tests) - average value of Leukocytes             | 0.354899 | INCLUDE |
| 2-year summary (Laboratory tests) - median value of Leukocytes              | 0.354899 | INCLUDE |
| 2-year summary (Laboratory tests) - count of normal tests for Leukocytes    | 0.354899 | INCLUDE |
| 2-year summary (Laboratory tests) - number of tests for Platelets           | 0.355119 | INCLUDE |
| 2-year summary (Laboratory tests) - days since earliest test for Platelets  | 0.355119 | INCLUDE |
| 2-year summary (Laboratory tests) - days since latest test for Platelets    | 0.355119 | INCLUDE |
| 2-year summary (Laboratory tests) - number of high values of Platelets      | 0.355119 | INCLUDE |
| 2-year summary (Laboratory tests) - highest value of Platelets              | 0.355119 | INCLUDE |
| 2-year summary (Laboratory tests) - number of low values of Platelets       | 0.355119 | INCLUDE |
| 2-year summary (Laboratory tests) - lowest value of Platelets               | 0.355119 | INCLUDE |
| 2-year summary (Laboratory tests) - average value of Platelets              | 0.355119 | INCLUDE |
| 2-year summary (Laboratory tests) - median value of Platelets               | 0.355119 | INCLUDE |
| 2-year summary (Laboratory tests) - count of normal tests for Platelets     | 0.355119 | INCLUDE |
| 2-year summary (Laboratory tests) - number of tests for Hemoglobin          | 0.355945 | INCLUDE |
| 2-year summary (Laboratory tests) - number of tests for Monocytes           | 0.355945 | INCLUDE |
| 2-year summary (Laboratory tests) - days since earliest test for Hemoglobin | 0.355945 | INCLUDE |

|                                                                             |          |         |
|-----------------------------------------------------------------------------|----------|---------|
| 2-year summary (Laboratory tests) - days since earliest test for Monocytes  | 0.355945 | INCLUDE |
| 2-year summary (Laboratory tests) - days since latest test for Hemoglobin   | 0.355945 | INCLUDE |
| 2-year summary (Laboratory tests) - days since latest test for Monocytes    | 0.355945 | INCLUDE |
| 2-year summary (Laboratory tests) - number of high values of Hemoglobin     | 0.355945 | INCLUDE |
| 2-year summary (Laboratory tests) - number of high values of Monocytes      | 0.355945 | INCLUDE |
| 2-year summary (Laboratory tests) - highest value of Hemoglobin             | 0.355945 | INCLUDE |
| 2-year summary (Laboratory tests) - highest value of Monocytes              | 0.355945 | INCLUDE |
| 2-year summary (Laboratory tests) - number of low values of Hemoglobin      | 0.355945 | INCLUDE |
| 2-year summary (Laboratory tests) - number of low values of Monocytes       | 0.355945 | INCLUDE |
| 2-year summary (Laboratory tests) - lowest value of Hemoglobin              | 0.355945 | INCLUDE |
| 2-year summary (Laboratory tests) - lowest value of Monocytes               | 0.355945 | INCLUDE |
| 2-year summary (Laboratory tests) - average value of Hemoglobin             | 0.355945 | INCLUDE |
| 2-year summary (Laboratory tests) - average value of Monocytes              | 0.355945 | INCLUDE |
| 2-year summary (Laboratory tests) - median value of Hemoglobin              | 0.355945 | INCLUDE |
| 2-year summary (Laboratory tests) - median value of Monocytes               | 0.355945 | INCLUDE |
| 2-year summary (Laboratory tests) - count of normal tests for Hemoglobin    | 0.355945 | INCLUDE |
| 2-year summary (Laboratory tests) - count of normal tests for Monocytes     | 0.355945 | INCLUDE |
| 2-year summary (Laboratory tests) - number of tests for Basophils           | 0.356110 | INCLUDE |
| 2-year summary (Laboratory tests) - days since earliest test for Basophils  | 0.356110 | INCLUDE |
| 2-year summary (Laboratory tests) - days since latest test for Basophils    | 0.356110 | INCLUDE |
| 2-year summary (Laboratory tests) - number of high values of Basophils      | 0.356110 | INCLUDE |
| 2-year summary (Laboratory tests) - highest value of Basophils              | 0.356110 | INCLUDE |
| 2-year summary (Laboratory tests) - number of low values of Basophils       | 0.356110 | INCLUDE |
| 2-year summary (Laboratory tests) - lowest value of Basophils               | 0.356110 | INCLUDE |
| 2-year summary (Laboratory tests) - average value of Basophils              | 0.356110 | INCLUDE |
| 2-year summary (Laboratory tests) - median value of Basophils               | 0.356110 | INCLUDE |
| 2-year summary (Laboratory tests) - count of normal tests for Basophils     | 0.356110 | INCLUDE |
| 2-year summary (Doctor visits) - DIAGNOSTIC RADIOLOGY                       | 0.360240 | INCLUDE |
| 2-year summary (Laboratory tests) - number of tests for Creatinine          | 0.377750 | INCLUDE |
| 2-year summary (Laboratory tests) - days since earliest test for Creatinine | 0.377750 | INCLUDE |
| 2-year summary (Laboratory tests) - days since latest test for Creatinine   | 0.377750 | INCLUDE |

|                                                                                                          |          |         |
|----------------------------------------------------------------------------------------------------------|----------|---------|
| 2-year summary (Laboratory tests) - number of high values of Creatinine                                  | 0.377750 | INCLUDE |
| 2-year summary (Laboratory tests) - highest value of Creatinine                                          | 0.377750 | INCLUDE |
| 2-year summary (Laboratory tests) - number of low values of Creatinine                                   | 0.377750 | INCLUDE |
| 2-year summary (Laboratory tests) - lowest value of Creatinine                                           | 0.377750 | INCLUDE |
| 2-year summary (Laboratory tests) - average value of Creatinine                                          | 0.377750 | INCLUDE |
| 2-year summary (Laboratory tests) - median value of Creatinine                                           | 0.377750 | INCLUDE |
| 2-year summary (Laboratory tests) - count of normal tests for Creatinine                                 | 0.377750 | INCLUDE |
| 2-year summary (Laboratory tests) - number of tests for Erythrocyte_mean_corpuscular_hemoglobin          | 0.397462 | INCLUDE |
| 2-year summary (Laboratory tests) - days since earliest test for Erythrocyte_mean_corpuscular_hemoglobin | 0.397462 | INCLUDE |
| 2-year summary (Laboratory tests) - days since latest test for Erythrocyte_mean_corpuscular_hemoglobin   | 0.397462 | INCLUDE |
| 2-year summary (Laboratory tests) - number of high values of Erythrocyte_mean_corpuscular_hemoglobin     | 0.397462 | INCLUDE |
| 2-year summary (Laboratory tests) - highest value of Erythrocyte_mean_corpuscular_hemoglobin             | 0.397462 | INCLUDE |
| 2-year summary (Laboratory tests) - number of low values of Erythrocyte_mean_corpuscular_hemoglobin      | 0.397462 | INCLUDE |
| 2-year summary (Laboratory tests) - lowest value of Erythrocyte_mean_corpuscular_hemoglobin              | 0.397462 | INCLUDE |
| 2-year summary (Laboratory tests) - average value of Erythrocyte_mean_corpuscular_hemoglobin             | 0.397462 | INCLUDE |
| 2-year summary (Laboratory tests) - median value of Erythrocyte_mean_corpuscular_hemoglobin              | 0.397462 | INCLUDE |
| 2-year summary (Laboratory tests) - count of normal tests for Erythrocyte_mean_corpuscular_hemoglobin    | 0.397462 | INCLUDE |



**Supplementary Table 2 - Calibration curve raw data**

| <b>Decile of predicted risk</b> | <b>XGBoost predicted risk score</b> | <b>Actual risk score</b> |
|---------------------------------|-------------------------------------|--------------------------|
| 1                               | 0.010041                            | 0                        |
| 2                               | 0.012682                            | 0.005525                 |
| 3                               | 0.016369                            | 0.005376                 |
| 4                               | 0.02382                             | 0.019284                 |
| 5                               | 0.033734                            | 0.027548                 |
| 6                               | 0.04851                             | 0.027548                 |
| 7                               | 0.069461                            | 0.054795                 |
| 8                               | 0.104906                            | 0.09863                  |
| 9                               | 0.191218                            | 0.176309                 |
| 10                              | 0.428636                            | 0.426966                 |
